# Supplementary material
Source: PubMed Central journal article supplement (PMC2973910)
Supplement: 1013786107_pnas.201013786SI.pdf [file 1013786107_pnas.201013786SI.pdf]

# Supporting Information

Avise and Liu 10.1073/pnas.1013786107

**Table S1. Multiple mating for 27 broods of Shiner perch from Newport Bay based on microsatellite data**

| Family | Brood size ( <i>n</i> ) | Standard length (mm) | No. of sires |
|--------|-------------------------|----------------------|--------------|
| SP01   | 12                      | 108                  | 2            |
| SP02   | 13                      | 112                  | 5            |
| SP03   | 11                      | 111                  | 5            |
| SP04   | 13                      | 115                  | 4            |
| SP05   | 16                      | 114                  | 6            |
| SP06   | 14                      | 111                  | 8            |
| SP07   | 13                      | 101                  | 4            |
| SP08   | 12                      | 106                  | 2            |
| SP09   | 14                      | 112                  | 2            |
| SP10   | 13                      | 111                  | 5            |
| SP11   | 9                       | 98                   | 6            |
| SP12   | 12                      | 108                  | 7            |
| SP13   | 15                      | 121                  | 6            |
| SP14   | 14                      | 114                  | 6            |
| SP15   | 11                      | 103                  | 6            |
| SP16   | 12                      | 117                  | 4            |
| SP17   | 22                      | 127                  | 4            |
| SP18   | 15                      | 115                  | 2            |
| SP19   | 11                      | 104                  | 1            |
| SP20   | 12                      | 112                  | 7            |
| SP21   | 13                      | 108                  | 2            |
| SP22   | 12                      | 114                  | 4            |
| SP23   | 12                      | 104                  | 5            |
| SP24   | 13                      | 113                  | 8            |
| SP25   | 7                       | 97                   | 2            |
| SP26   | 12                      | 114                  | 7            |
| SP27   | 15                      | 117                  | 5            |

Brood size (*n*), standard length, and number of sires as calculated by COLONY version 2.0.1.1 (1) are provided.

1. Wang J (2004) Sibship reconstruction from genetic data with typing errors. *Genetics* 166:1963–1979.
